# Supplementary material
Source: PubMed Central journal article supplement (PMC7737620)
Supplement: EMBJ-39-e105896-s001.pdf [file EMBJ-39-e105896-s001.pdf]

# Appendix

## Table of Contents:

Appendix Figure S1: .....2

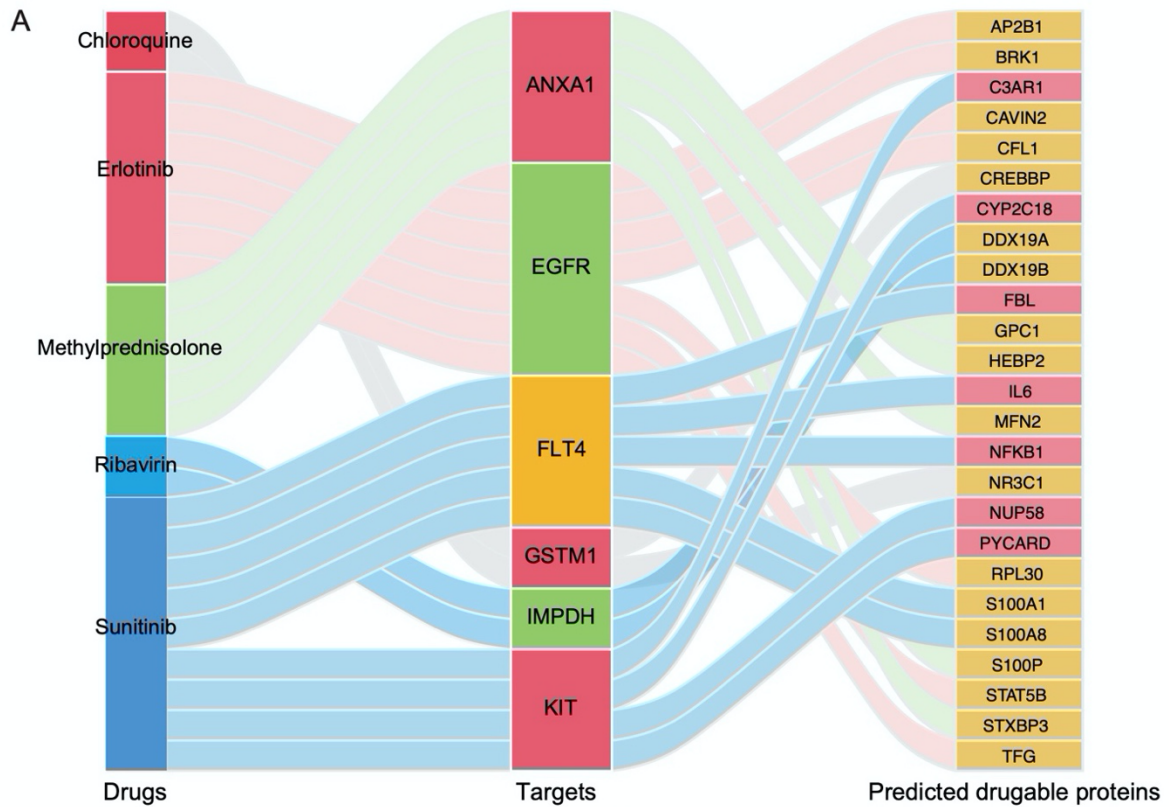

■ Drug-targets upregulated in mild patients  
■ Drug-targets upregulated in severe patients  
■ Drug-targets upregulated in both mild and severe patients  
■ Predicted drugable proteins upregulated in mild patients  
■ Predicted drugable proteins upregulated in severe patients

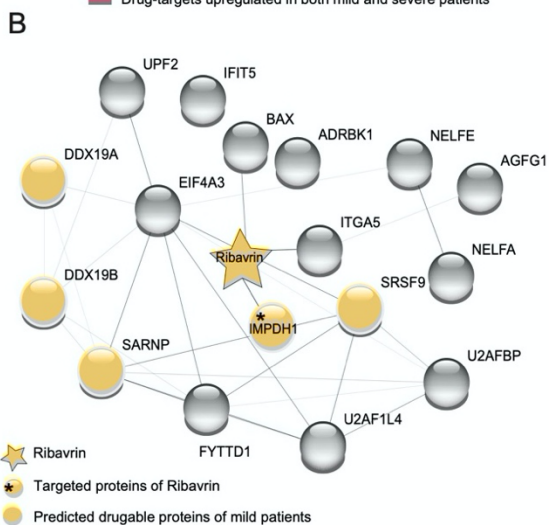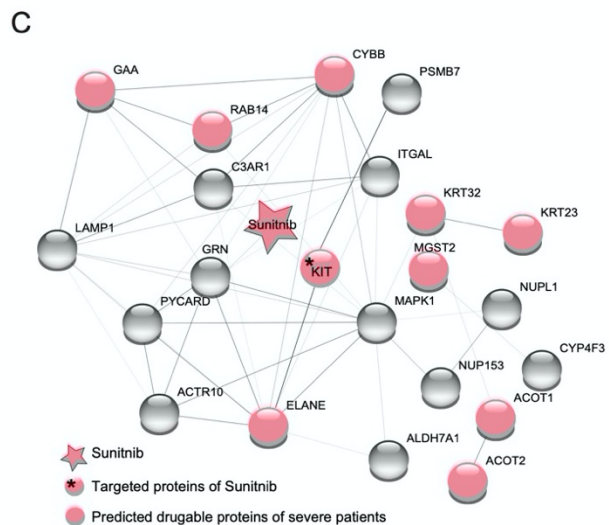

**Appendix Figure S1 A drug-protein network for predicting novel drug candidates.**

- (A) The snaky plot indicates the correlation network of drug, drug targets and predicted-drug targets.
- (B) Network indicating the interactions between Ribavirin, IMPDH1 (target of Ribavirin) and predicted druggable proteins in mild COVID-19 patients.
- (C) Network indicating the interactions between Sunitinib, KIT (target of Sunitinib) and predicted druggable proteins in severe COVID-19 patients.
